# Supplementary material for: Depth Profile of Nitrifying Archaeal and Bacterial Communities in the Remote Oligotrophic Waters of the North Pacific
Source: Front Microbiol. 2021 Feb 23;12:624071. doi: 10.3389/fmicb.2021.624071 (PMC7959781; doi:10.3389/fmicb.2021.624071)
Supplement: Supplementary Table 1 — Summary of sequence processing in collected samples. [file Table_1.XLSX]

## Sheet: Folha2
Table S1. Summary of sequence processing in collected samples
Depth Classification	Sample ID	Input	Filtered	Merged	Non chimera	Final output*	Nitrifying subset#
Surface (3-5m)	4A	126354	110922	87921	74343	71932	0
	8A	38147	33093	28698	25229	24682	0
	12A	42451	36779	30636	25990	25161	0
	16A	69639	60311	49988	42178	40640	0
	20A	56439	48396	38827	33061	31883	0
	53A	112195	97237	74060	63342	59256	1712
	55A	61149	53910	48679	43494	42820	63
	57A	73722	63353	54045	46360	44845	24
	59A	84392	74480	61741	52971	51054	9
	71A	79395	68638	55904	48554	47274	0
	73A	63945	53467	45076	39264	38219	0
DCM (107-130m)	3A	76148	66989	52880	46496	44108	387
	7A	47128	40784	30237	26243	24277	431
	11A	56201	49299	41506	36534	34659	179
	15A	72153	61682	46687	40521	37449	637
	18A	86160	74219	54846	47905	44623	860
	52A	56738	48266	38644	34297	32997	34
	54A	93900	82444	68938	61373	59544	42
	56A	74972	64573	52841	44776	42652	10
	58A	82042	70697	53982	47564	45296	55
	70A	58190	49346	37705	32907	30609	289
	72A	54326	47231	39951	35607	34408	790
Bellow DCM (175-200m)	2A	105949	91796	67750	60208	59927	10175
	6A	30808	25956	17867	16033	16004	2743
	10A	40801	34749	23614	20749	20621	3894
	14A	78690	67297	52210	46010	45654	7723
Mesopelagic (500m)	1A	73436	63165	46994	43416	43408	11659
	5A	55018	47528	36174	33479	33465	9306
	9A	73651	63312	50426	46580	46528	12371
	13A	91066	79285	59762	55541	55515	14827
	17A	51765	44047	31901	29624	29617	6799
* after removal of ASVs assigned to Eukaryota, Chloroplast, and Mitochondria.
# after selection of putative nitrifying ASVs
